# Supplementary material for: Sulforaphane elicts dual therapeutic effects on Renal Inflammatory Injury and crystal deposition in Calcium Oxalate Nephrocalcinosis
Source: PubMed Central journal article supplement (PMC7330860; doi:10.7150/thno.44054), 2020-06-05
Supplement: thnov10p7319s1.pdf [file thnov10p7319s1.pdf]

## Supplemental Materials

---

Supplementary Table 1. List of primer sequences used for the real-time qPCR analysis.

Supplementary Table 2. PET-CT examination reveals relationship between intrarenal inflammation and kidney stone size.

Supplementary Table 3. Selected miRNAs targeted TLR4 or IRF1 positively predicted by four databases.

Supplementary Table 4. Serum BUN and Creatinine levels in mouse model.

Supplementary Figure 1. Quantification of CaOx crystal deposition, PAS staining, TUNEL staining in SFN treated CaOx nephrocalcinosis mice.

Supplementary Figure 2. RNA-Seq heatmap, Volcano plots, Kyoto Encyclopedia of Genes and Genomes enrichment and Gene ontology analyses in Nrf2 knockout BMDM.

Supplementary Figure 3. Quantification of real-time PCR (qPCR), immunofluorescence and flow cytometric analysis in BMDMs.

Supplementary Figure 4. Immunofluorescence and flow cytometry analysis the polarization of BMDMs transfected with miR-93 mimics or inhibitor.

Supplementary Figure 5. Quantification of immunofluorescence, phagocytosis rate and flow cytometric analysis in BMDMs.

Supplementary Figure 6. qPCR analyses of Nrf2, TLR4, IRF1, iNOS, ARG-1 levels in mouse kidney and quantification of CaOx crystal deposition, PAS staining, TUNEL staining, Nrf2, TLR4, IRF1 IHC staining, miR-93 FISH and immunofluorescence in mice kidney samples.

Supplementary Figure 7. IHC detection and quantification of F4/80 and iNOS levels in kidney samples.

---

**Supplementary Table 1.** List of primer sequences used for the real-time qPCR analysis

| <b>Name</b> | <b>(5'-3')</b> | <b>SEQUENCE (5'-3')</b>  |
|-------------|----------------|--------------------------|
| Nrf2        | Forward        | TTTTCCATTCCCGAATTACAGT   |
|             | Reverse        | AGGAGATCGATGAGTAAAAATGGT |
| TLR4        | Forward        | TCTGGGGAGGCACATCTTCT     |
|             | Reverse        | AGGTCCAAGTTGCCGTTTCT     |
| IRF1        | Forward        | TTGGCATCATGGTGGCTGT      |
|             | Reverse        | AAGGAGGATGGTCCCCTGTTT    |
| iNOS        | Forward        | CACCTTGGAGTTCACCCAGT     |
|             | Reverse        | ACCACTCGTACTTGGGATGC     |
| ARG1        | Forward        | TGGCTTGCAGACGTAGAC       |
|             | Reverse        | GTCAGGTGAATCGGCCTTTT     |
| GAPDH       | Forward        | TGCTGAGTATGTCGTGGAGTCTA  |
|             | Reverse        | AGTGGGAGTTGCTGTTGAAGTCG  |

**Supplementary Table 2.** PET-CT examination reveals relationship between intrarenal inflammation and kidney stone size.

| Patients      | ROI <sub>max</sub> (stone kidney) |              | Stone Volume (mm <sup>3</sup> ) |              |
|---------------|-----------------------------------|--------------|---------------------------------|--------------|
|               | 1st Scanning                      | 2nd Scanning | 1st Scanning                    | 2nd Scanning |
| Patient NO.1  | 4.69                              | 5.22         | 683.4                           | 997.2        |
| Patient NO.2  | 5.13                              | 4.93         | 536.7                           | 689.1        |
| Patient NO.3  | 2.85                              | 3.13         | 508.3                           | 529.3        |
| Patient NO.4  | 5.73                              | 5.00         | 683.8                           | 723.1        |
| Patient NO.5  | 5.24                              | 4.30         | 896.3                           | 913.6        |
| Patient NO.6  | 2.85                              | 3.79         | 489.7                           | 763.1        |
| Patient NO.7  | 3.30                              | 3.22         | 672.9                           | 697.3        |
| Patient NO.8  | 4.02                              | 4.59         | 537.1                           | 721.6        |
| Patient NO.9  | 4.46                              | 3.95         | 581.2                           | 603.8        |
| Patient NO.10 | 3.49                              | 4.07         | 483.6                           | 662.8        |

Abbreviations: ROI, region of interest.

**Supplementary Table 3.** Selected miRNAs targeted TLR4 or IRF1 positively predicted by four databases.

| Gene | RefseqID    | miRNA            | MIMATid      | miRWalk | miRanda | RNA22 | Targetscan | SUM |
|------|-------------|------------------|--------------|---------|---------|-------|------------|-----|
| TLR4 | NC_000070.6 | mmu-miR-182-5p   | MIMAT0000211 | 1       | 1       | 1     | 1          | 4   |
| TLR4 | NC_000070.6 | mmu-miR-216a-5p  | MIMAT0000662 | 1       | 1       | 1     | 1          | 4   |
| TLR4 | NC_000070.6 | mmu-miR-17-5p    | MIMAT0000649 | 1       | 1       | 1     | 1          | 4   |
| TLR4 | NC_000070.6 | mmu-miR-20a-5p   | MIMAT0000529 | 1       | 1       | 1     | 1          | 4   |
| TLR4 | NC_000070.6 | mmu-miR-20b-5p   | MIMAT0003187 | 1       | 1       | 1     | 1          | 4   |
| TLR4 | NC_000070.6 | mmu-miR-93-5p    | MIMAT0000540 | 1       | 1       | 1     | 1          | 4   |
| TLR4 | NC_000070.6 | mmu-miR-106a-5p  | MIMAT0000385 | 1       | 1       | 1     | 1          | 4   |
| TLR4 | NC_000070.6 | mmu-miR-106b-5p  | MIMAT0000386 | 1       | 1       | 1     | 1          | 4   |
| TLR4 | NC_000070.6 | mmu-miR-27a-3p   | MIMAT0004633 | 1       | 1       | 1     | 1          | 4   |
| TLR4 | NC_000070.6 | mmu-miR-27b-3p   | MIMAT0004522 | 1       | 1       | 1     | 1          | 4   |
| IRF1 | NC_000077.6 | mmu-miR-140-3p.1 | MIMAT0000152 | 1       | 1       | 1     | 1          | 4   |
| IRF1 | NC_000077.6 | mmu-miR-130a-3p  | MIMAT0016983 | 1       | 1       | 1     | 1          | 4   |
| IRF1 | NC_000077.6 | mmu-miR-130b-3p  | MIMAT0004583 | 1       | 1       | 1     | 1          | 4   |
| IRF1 | NC_000077.6 | mmu-miR-301a-3p  | MIMAT0017008 | 1       | 1       | 1     | 1          | 4   |
| IRF1 | NC_000077.6 | mmu-miR-301b-3p  | MIMAT0017232 | 1       | 1       | 1     | 1          | 4   |
| IRF1 | NC_000077.6 | mmu-miR-23a-3p   | MIMAT0017019 | 1       | 1       | 1     | 1          | 4   |
| IRF1 | NC_000077.6 | mmu-miR-23b-3p   | MIMAT0016980 | 1       | 1       | 1     | 1          | 4   |
| IRF1 | NC_000077.6 | mmu-miR-9-5p     | MIMAT0000142 | 1       | 1       | 1     | 1          | 4   |
| IRF1 | NC_000077.6 | mmu-miR-383-5p   | MIMAT0000748 | 1       | 1       | 1     | 1          | 4   |
| IRF1 | NC_000077.6 | mmu-miR-17-5p    | MIMAT0000649 | 1       | 1       | 1     | 1          | 4   |
| IRF1 | NC_000077.6 | mmu-miR-20a-5p   | MIMAT0000529 | 1       | 1       | 1     | 1          | 4   |
| IRF1 | NC_000077.6 | mmu-miR-20b-5p   | MIMAT0003187 | 1       | 1       | 1     | 1          | 4   |
| IRF1 | NC_000077.6 | mmu-miR-93-5p    | MIMAT0000540 | 1       | 1       | 1     | 1          | 4   |
| IRF1 | NC_000077.6 | mmu-miR-106a-5p  | MIMAT0000385 | 1       | 1       | 1     | 1          | 4   |
| IRF1 | NC_000077.6 | mmu-miR-106b-5p  | MIMAT0000386 | 1       | 1       | 1     | 1          | 4   |
| IRF1 | NC_000077.6 | mmu-miR-203-3p   | MIMAT0000236 | 1       | 1       | 1     | 1          | 4   |
| IRF1 | NC_000077.6 | mmu-miR-124-3p   | MIMAT0000134 | 1       | 1       | 1     | 1          | 4   |
| IRF1 | NC_000077.6 | mmu-miR-142a-3p  | MIMAT0000155 | 1       | 1       | 1     | 1          | 4   |

miRWalk: <http://zmf.umm.uni-heidelberg.de/apps/zmf/mirwalk2/generetsys-self.html>

miRanda: <http://www.microrna.org/microrna/getGeneForm.do>

RNA22: <https://cm.jefferson.edu/rna22/Interactive/>

Targetscan: [http://www.targetscan.org/vert\\_71/](http://www.targetscan.org/vert_71/)

**Supplementary Table 4.** Serum BUN and Creatinine levels in mouse model.

| Parameter                   | Time                 | NC            | Gly                        | Gly + SFN                  | Gly +<br>AntagomiR-93      | Gly + SFN +<br>AntagomiR-93 |
|-----------------------------|----------------------|---------------|----------------------------|----------------------------|----------------------------|-----------------------------|
| Serum creatinine<br>(mg/dl) | 3 <sup>rd</sup> day  | 0.156 ± 0.021 | 0.162 ± 0.018              | 0.161 ± 0.023              | 0.148 ± 0.016              | 0.152 ± 0.020               |
|                             | 4 <sup>th</sup> day  | 0.157 ± 0.018 | 0.329 ± 0.028 <sup>a</sup> | 0.241 ± 0.022 <sup>b</sup> | 0.362 ± 0.030 <sup>b</sup> | 0.362 ± 0.031 <sup>c</sup>  |
|                             | 10 <sup>th</sup> day | 0.159 ± 0.026 | 0.539 ± 0.043 <sup>a</sup> | 0.228 ± 0.034 <sup>b</sup> | 0.598 ± 0.03 <sup>b</sup>  | 0.326 ± 0.023 <sup>c</sup>  |
| Serum BUN<br>(mg/dl)        | 3 <sup>rd</sup> day  | 23.36 ± 1.02  | 24.08 ± 1.13               | 23.65 ± 1.28               | 24.16 ± 1.02               | 22.96 ± 1.36                |
|                             | 4 <sup>th</sup> day  | 23.85 ± 1.29  | 53.26 ± 3.39 <sup>a</sup>  | 42.68 ± 2.79 <sup>b</sup>  | 60.08 ± 3.49 <sup>b</sup>  | 49.36 ± 1.99 <sup>c</sup>   |
|                             | 10 <sup>th</sup> day | 22.26 ± 1.21  | 68.73 ± 4.89 <sup>a</sup>  | 35.99 ± 2.08 <sup>b</sup>  | 73.26 ± 4.04 <sup>b</sup>  | 43.76 ± 2.83 <sup>c</sup>   |

Abbreviations: BUN, blood urea nitrogen; NC, normal control; Gly, glyoxylate.

<sup>a</sup>  $p < 0.05$  compare with the NC group

<sup>b</sup>  $p < 0.05$  compare with the Gly group

<sup>c</sup>  $p < 0.05$  compare with the Gly + SFN group

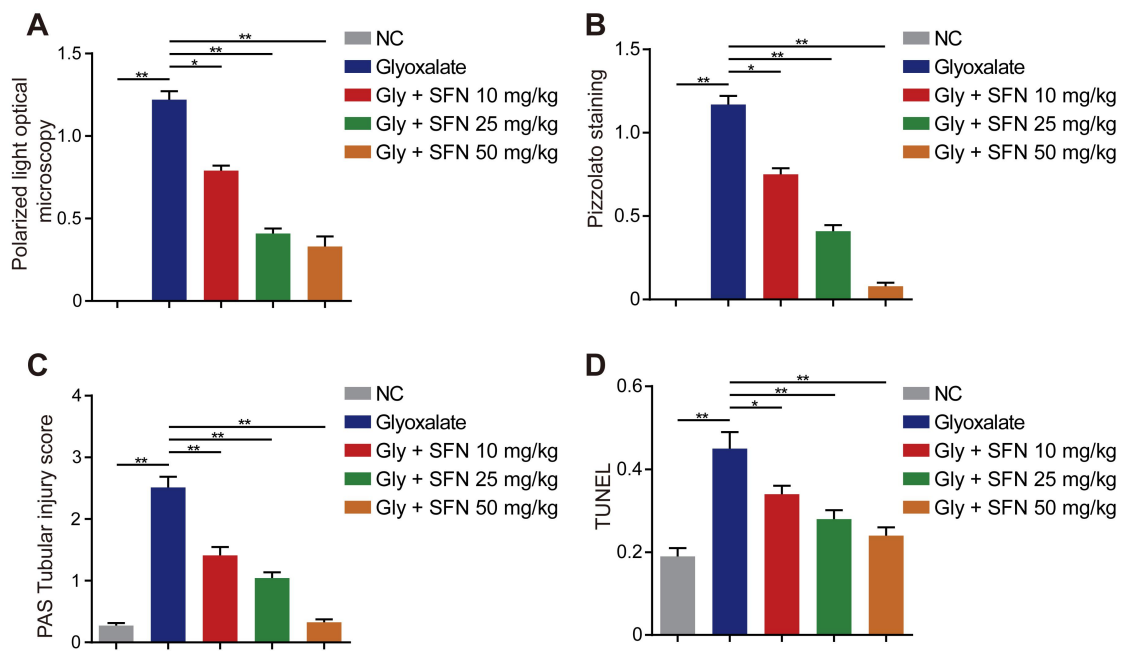

**Supplementary Figure 1. Quantification of CaOx crystal deposition, PAS staining, TUNEL**

**staining in SFN treated CaOx nephrocalcinosis mice.** (A) The ratio of areas with renal crystal

deposition detected by polarized light optical microscopy. (B) The ratio of areas with kidney

corticomedullary junction area crystal deposition. (C) The percentage of injured renal tubules displayed

in PAS staining. (D) The average number of TUNEL-positive cells per high power field (200 $\times$ ; n=10

fields per section). The data were showed as mean $\pm$ SD of three independent experiments. \*P < 0.05;

\*\*P < 0.01, by one-way ANOVA (A-D).

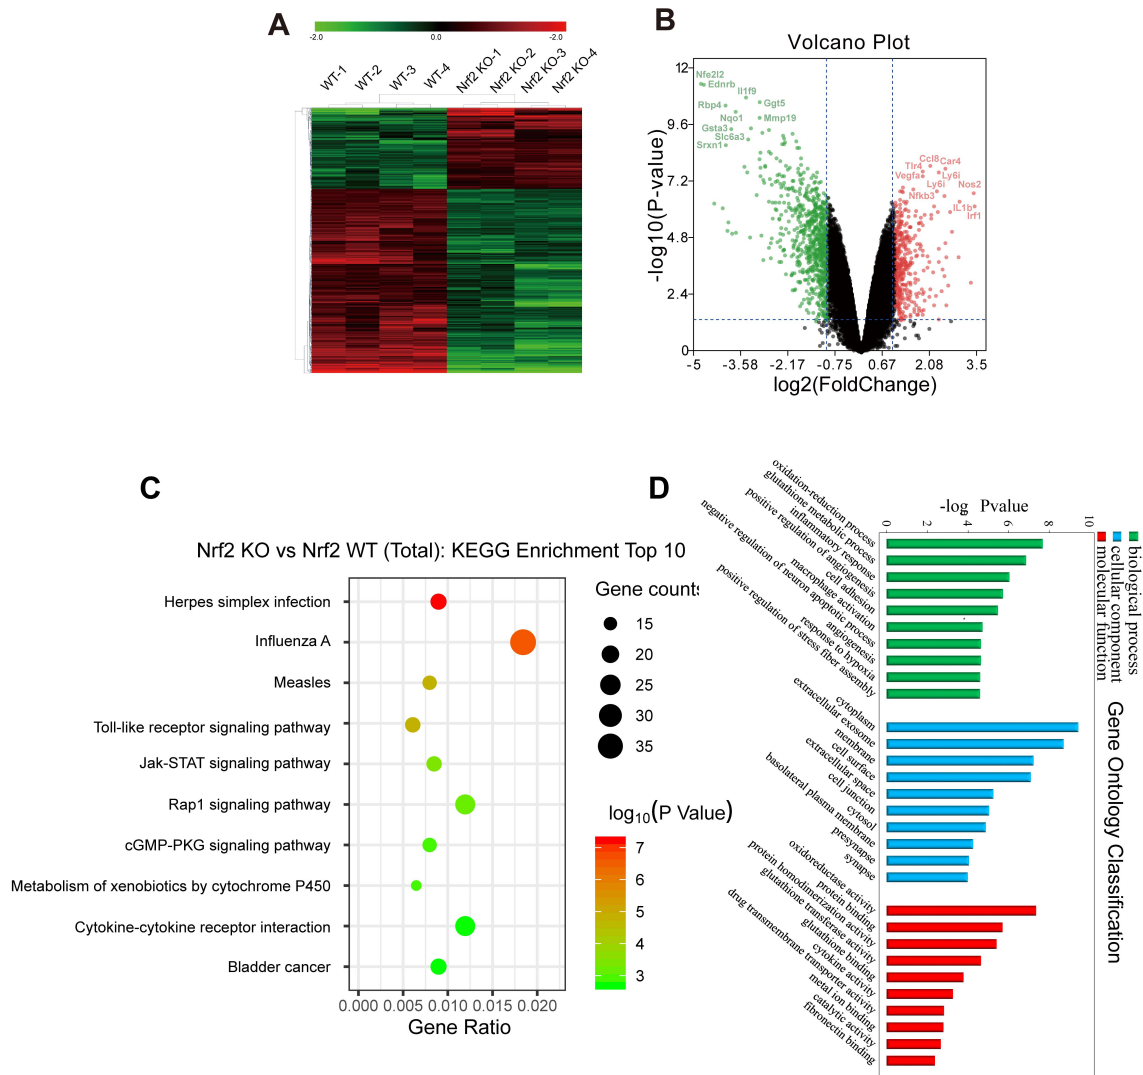

**Supplementary Figure 2. RNA-Seq heatmap, Volcano plots, Kyoto Encyclopedia of Genes and Genomes enrichment and Gene ontology analyses in Nrf2 knockout BMDM.**

(A) RNA-Seq heatmap showing significantly altered mRNAs in the BMDMs of Nrf2-knockout mice.

(B) Volcano plots showing differentially expressed mRNA transcripts between WT and Nrf2-knockout BMDMs.

(C) Kyoto Encyclopedia of Genes and Genomes enrichment analysis showed the top 10 significant pathway in Nrf2 knockout BMDM, in which Toll-like receptor signaling pathway containing TLR4 and Jak-STAT signaling pathway containing IRF1.

(D) Gene ontology analysis showed that inflammatory response and macrophage activation play a vital role in Nrf2 knockout BMDM.

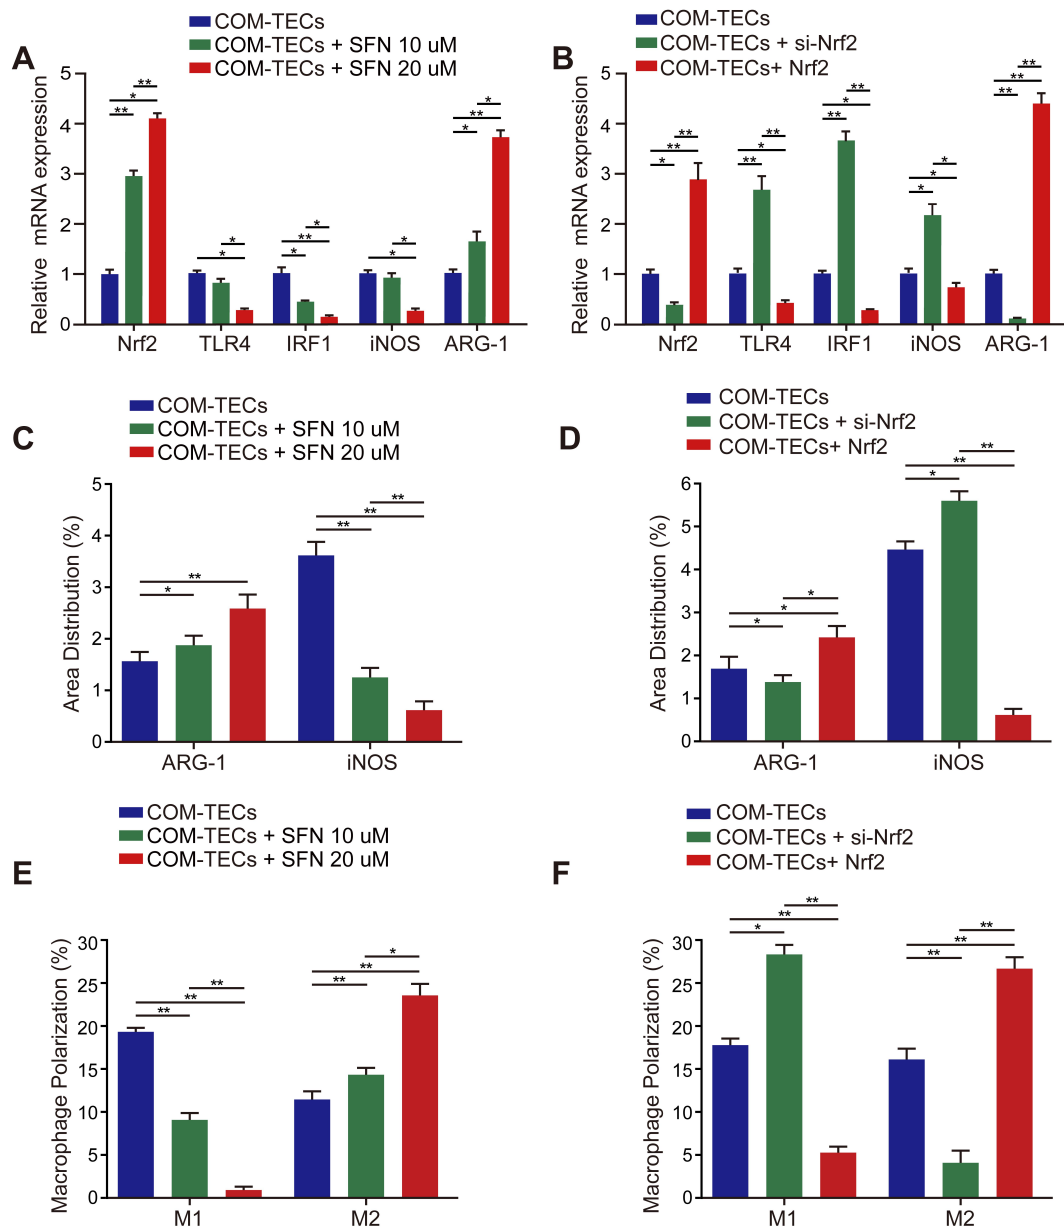

**Supplementary Figure 3. Quantification of real-time PCR (qPCR), immunofluorescence and flow**

**cytometric analysis in BMDMs.** (A, B) Real-time quantitative PCR (qPCR) analysis of Nrf2, TLR4,

IRF1, iNOS, and Arg1 expression in BMDMs. GAPDH was used as an internal control. (C, D)

Quantification of ARG-1 and iNOS fluorescent of Figure 3E, G. (E,F) Quantification of macrophage

polarization of Figure 3H, I. The data were showed as mean±SD of three independent experiments. \*P <

0.05; \*\*P < 0.01, by one-way ANOVA (A-F).



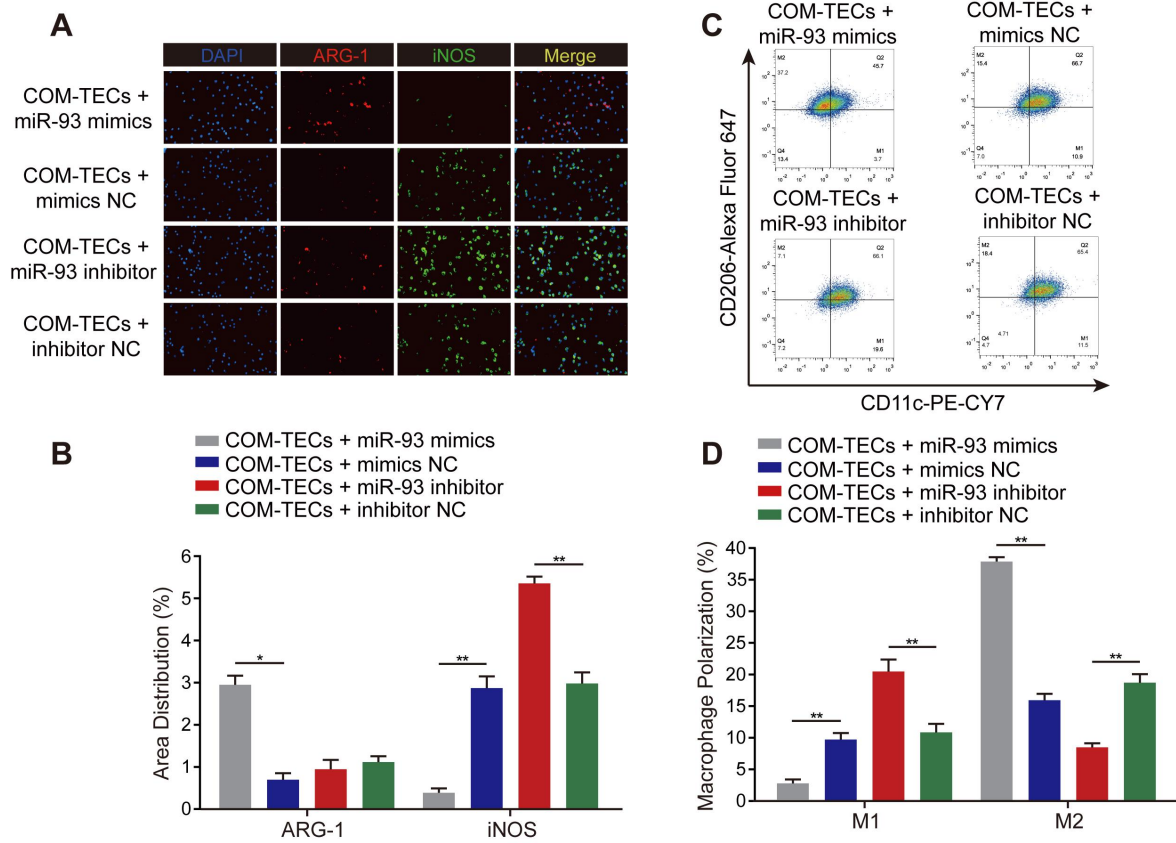

**Supplementary Figure 4. Immunofluorescence and flow cytometry analysis the polarization of**

**BMDMs transfected with miR-93 mimics or inhibitor. (A,B)** The distribution and quantification of

iNOS (green) and Arg1 (red) in BMDMs was detected by Immunofluorescence assay (C, D) Flow

cytometry analyzed and quantification of BMDMs polarization state with anti-CD11c and CD206 in

stored F4/80<sup>+</sup> and CD11b<sup>+</sup> cells. The data were showed as mean±SD of three independent experiments.

\*P < 0.05; \*\*P < 0.01, by one-way ANOVA (A-D).

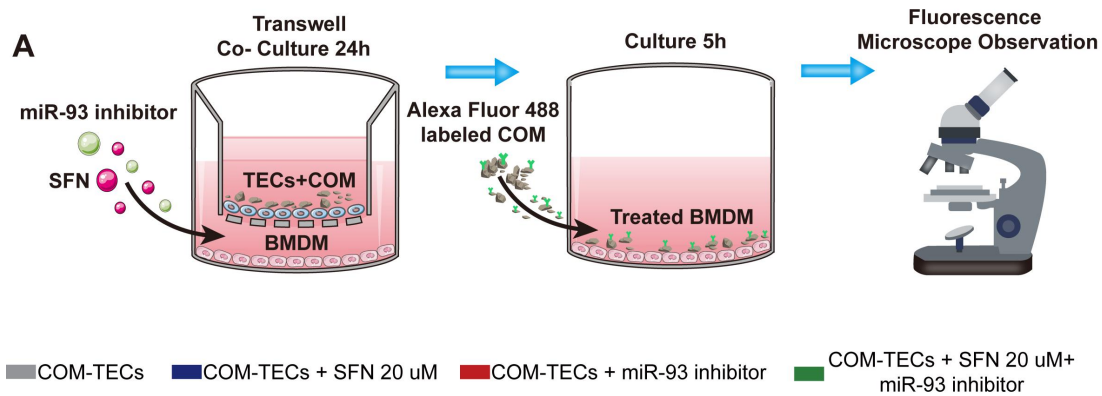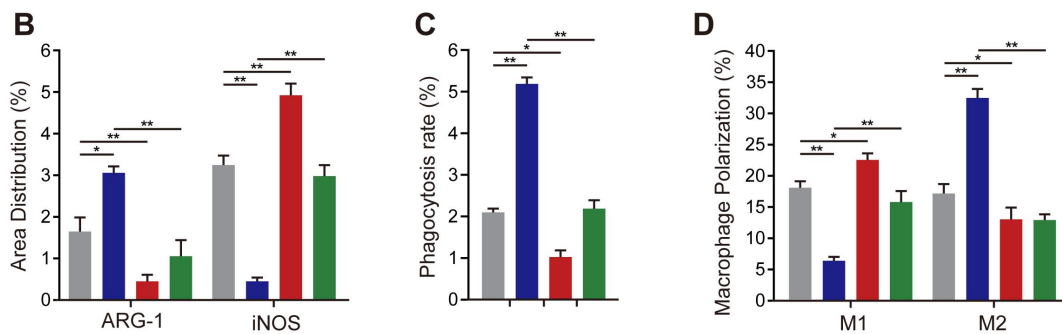

**Supplementary Figure 5. Quantification of immunofluorescence, phagocytosis rate and flow cytometric analysis in BMDMs.** (A) Schematic diagram of BMDMs phagocytic capacity testing. (B) Quantification of ARG-1 and iNOS fluorescent of Figure 5C. (C) Quantification of macrophage phagocytosis rate of Figure 5D. Quantification of macrophage polarization of Figure 5E. The data were showed as mean±SD of three independent experiments. \*P < 0.05; \*\*P < 0.01, by one-way ANOVA (B-D).

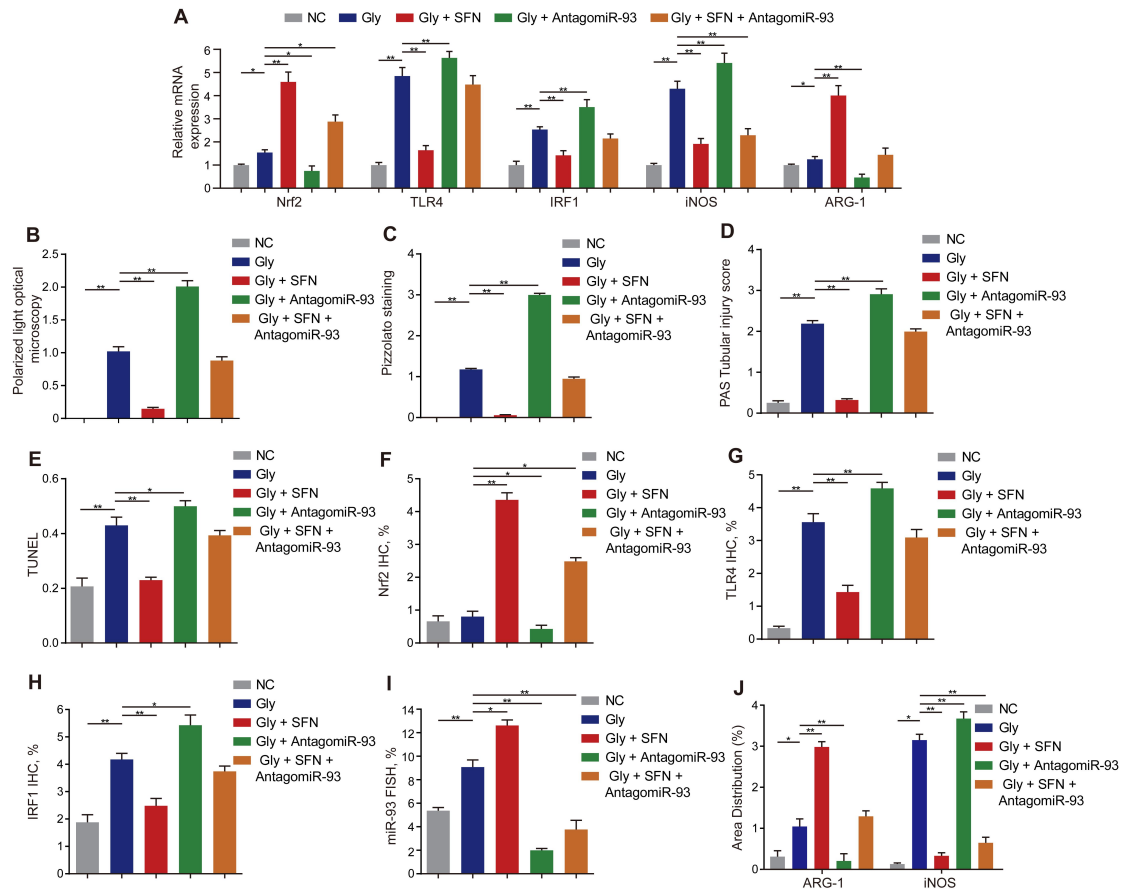

**Supplementary Figure 6. qPCR analyses of Nrf2, TLR4, IRF1, iNOS, ARG-1 levels in mouse kidney and quantification of CaOx crystal deposition, PAS staining, TUNEL staining, Nrf2, TLR4, IRF1 IHC staining, miR-93 FISH and immunofluorescence in mice kidney samples. (A)** qPCR detection of Nrf2, TLR4, IRF1, iNOS and ARG-1 expression in SFN-treated CaOx nephrocalcinosis mouse kidney samples and comparison with normal controls. (B) The ratio of areas with renal crystal deposition detected by polarized light optical microscopy. (C) The ratio of areas with kidney corticomedullary junction area crystal deposition. (D) The percentage of injured renal tubules displayed in PAS staining. (E) The average number of TUNEL-positive cells per high power field (200 $\times$ ; n=10 fields per section). (G, H, I) The ratio of areas with positive expression of Nrf2, TLR4, and IRF1 in IHC. (H) The ratio of areas with positive expression of miR-93 in FISH. (J) Quantification of ARG-1 and iNOS fluorescent. The data were showed as mean $\pm$ SD of three independent experiments.

\*P < 0.05; \*\*P < 0.01, by one-way ANOVA (A-I).

**Supplementary Figure 7. IHC detection and quantification of F4/80 and iNOS levels in kidney**

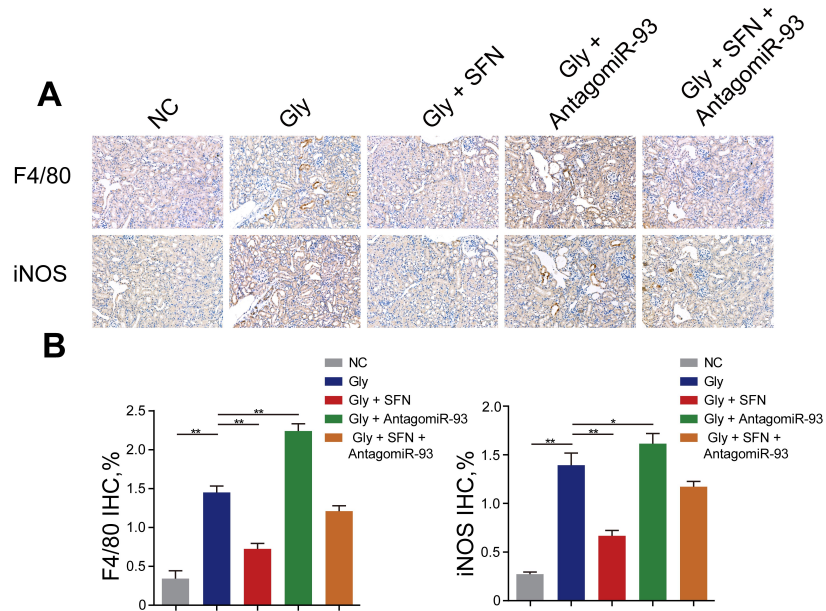

**samples.** (A) IHC staining of F4/80 and iNOS expression in kidney tissue (200× magnification; scale bar: 20 μm). (B) The ratio of areas with positive expression of F4/80 and iNOS expression in kidney tissue. The data were showed as mean±SD of three independent experiments. \*P < 0.05; \*\*P < 0.01, by one-way ANOVA (A, B).
